# Supplementary material for: Proteome-Based Analysis of Serologically Defined Tumor-Associated Antigens in Cutaneous Lymphoma
Source: PubMed Central journal article supplement (PMC2793029; doi:10.1371/journal.pone.0008376), 2009-12-18
Supplement: pone.0008376.s001.pdf [file pone.0008376.s001.pdf]

# Proteome-based analysis of serologically defined tumor-associated antigens in cutaneous lymphoma

Michael Forgber, Sylke Gellrich, Tumenjargal Sharav, Wolfram Sterry and Peter Walden

**Table S1: Listing of data of CB/TCL patients whose sera were tested**

| #  | Sex | Age | Diagnosis    | Grade/Stage | Treatment |
|----|-----|-----|--------------|-------------|-----------|
| 1  | F   | 66  | ery MF       | T4 N1 M0    | PUVA      |
| 2  | M   | 56  | LyPap        | low         | no        |
| 3  | F   | 75  | FCCL         | T1 N0 M0    | no        |
| 4  | M   | 69  | MF           | T1 N0 M0    | no        |
| 5  | F   | 73  | MF           | T0 N0 M0    | PUVA      |
| 6  | F   | 61  | MF           | T1 N1 M0    | no        |
| 7  | M   | 78  | MF           | T1 N0 M0    | no        |
| 8  | F   | 54  | pleo CTCL    | T1 N0 M0    | no        |
| 9  | F   | 56  | MF           | T1 N0 M0    | no        |
| 10 | F   | 72  | SS           | ery/leuk    | ECP       |
| 11 | M   | 54  | LyPap        | low         | no        |
| 12 | F   | 65  | LyPap        | low         | no        |
| 13 | F   | 82  | CBCL         | T1 N0 M0    | no        |
| 14 | F   | 77  | MF           | T4 N0 M0    | gluco/IFN |
| 15 | M   | 64  | MF           | T2 N0 M0    | no        |
| 16 | M   | 71  | FCCL         | T1 N0 M0    | no        |
| 17 | M   | 72  | DLBCL        | low         | no        |
| 18 | F   | 83  | SS           | ery/leuk    | gluco     |
| 19 | F   | 55  | MF           | T2 N0 M0    | no        |
| 20 | F   | 30  | FCCL         | low         | no        |
| 21 | M   | 49  | MF           | T0 N3 M0    | no        |
| 22 | M   | 75  | MF           | T2 N0 M0    | PUVA      |
| 23 | M   | 70  | MZL          | T1 N0 M0    | no        |
| 24 | F   | 78  | lc CBCL      | T1 N2 M0    | no        |
| 25 | M   | 43  | LyPap        | T1 N0 M0    | no        |
| 26 | F   | 21  | LyPap/MF     | low         | no        |
| 27 | M   | 63  | LyPap        | low         | no        |
| 28 | M   | 67  | pleo CTCL    | low         | no        |
| 29 | M   | 39  | CBCL         | T1 N0 M0    | no        |
| 30 | M   | 81  | FCCL         | T2 N0 M0    | no        |
| 31 | M   | 49  | LyPap/MF     | T1 N0 M0    | MTX       |
| 32 | F   | 56  | cytotox CTCL | T1 N0 M0    | no        |
| 33 | F   | 56  | MF           | T1 N0 M0    | no        |
| 34 | M   | 61  | MF           | T2 N0 M0    | no        |
| 35 | M   | 55  | MF           | ecz         | no        |
| 36 | M   | 60  | MF           | T2 N0 M0    | PUVA      |
| 37 | F   | 72  | MF           | T1 N0 M0    | no        |
| 38 | M   | 51  | FCCL         | T1 N0 M0    | no        |
| 39 | F   | 83  | MF           | T2 N0 M0    | MTX       |
| 40 | F   | 79  | MF           | T2 N1 M0    | gluco     |
| 41 | M   | 68  | LyPap/MF     | T2 N0 M0    | MTX       |
| 42 | M   | 56  | FCCL         | T1 N0 M0    | no        |
| 43 | F   | 62  | FCCL         | T1 N0 M0    | no        |
| 44 | F   | 66  | MF           | T2 N0 M0    | no        |

| #  | Sex | Age | Diagnosis               | Grade/Stage  | Treatment |
|----|-----|-----|-------------------------|--------------|-----------|
| 45 | M   | 73  | MF                      | T1 N0 M0     | no        |
| 46 | M   | 16  | LyPap                   | T2 N0 M0     | no        |
| 47 | F   | 70  | gra MF                  | T1 N1 M0     | no        |
| 48 | M   | 83  | DLBCL leg               | plaque       | no        |
| 49 | M   | 68  | LyPap                   | T1 N0 M0     | no        |
| 50 | F   | 75  | MF                      | T2 N0 M0     | no        |
| 51 | F   | 63  | LyPap                   | low          | no        |
| 52 | F   | 77  | cytotox CTCL            | T1 N0 M0     | no        |
| 53 | M   | 76  | MF                      | T2 N2 M0     | PUVA      |
| 54 | F   | 70  | pleo CTCL               | T1 N1 M0     | no        |
| 55 | M   | 67  | FCCL                    | T2 N1 M0     | no        |
| 56 | F   | 66  | pleo CTCL               | T1 N0 M0     | no        |
| 57 | M   | 34  | MF                      | T2 N0 M0     | no        |
| 58 | M   | 75  | MF                      | T2 N0 M0     | gluco     |
| 59 | M   | 38  | FCCL                    | T2 N0 M0     | IFN       |
| 60 | F   | 88  | MF                      | plaque       | gluco/PUV |
| 61 | M   | 56  | MF                      | T1 N0 M0     | no        |
| 62 | M   | 38  | FCCL                    | T1 N0 M0     | no        |
| 63 | M   | 77  | LyPap                   | T1 N0 M0     | no        |
| 64 | F   | 66  | pleo CTCL               | T1 N0 M0     | no        |
| 65 | M   | 66  | CD30 <sup>+</sup> lc CL | T1 N0 M0     | no        |
| 66 | F   | 52  | MF                      | ecz          | UVB       |
| 67 | M   | 88  | MF                      | ecz          | no        |
| 68 | F   | 70  | MF                      | T1 N0 M0     | gluco     |
| 69 | M   | 68  | MF                      | ecz          | no        |
| 70 | M   | 64  | LyPap                   | ecz          | gluco     |
| 71 | M   | 72  | MCL                     | T1 N0 M0     | IFN       |
| 72 | M   | 66  | FCCL                    | T1 N0 M0     | no        |
| 73 | M   | 69  | pleo CTCL               | T1 N0 M0     | no        |
| 74 | M   | 38  | LyPap                   | T2 N0 M0     | MTX       |
| 75 | F   | 74  | MF                      | T1 N0 M0     | no        |
| 76 | M   | 59  | MF                      | T2 N0 M0     | no        |
| 77 | M   | 59  | pleo CTCL               | T1 N0 M0     | no        |
| 78 | F   | 80  | SS                      | leuk         | no        |
| 79 | M   | 68  | MF                      | T2 N1 M0     | no        |
| 80 | M   | 75  | MF                      | plaque       | no        |
| 81 | M   | 75  | MF                      | T2 N0 M0     | no        |
| 82 | M   | 33  | leuk MF                 | Leuk/plaques | no        |
| 83 | M   | 79  | CTCL                    | T2 N0 M0     | no        |
| 84 | M   | 91  | CBCL                    | T2 N0 M0     | no        |
| 85 | M   | 80  | MF                      | T2 N0 M0     | no        |
| 86 | M   | 58  | MF                      | T1 N0 M0     | no        |
| 87 | M   | 76  | MF                      | T2 N0 M0     | no        |

|                         |                                             |
|-------------------------|---------------------------------------------|
| CBCL                    | cutaneous B cell lymphoma                   |
| CD30 <sup>+</sup> lc CL | CD30 positive large cell cutaneous lymphoma |
| CTCL                    | cutaneous T cell lymphoma                   |
| cytotox CL              | cytotoxic cutaneous lymphoma                |
| DLBCL                   | diffuse large B cell lymphoma               |
| ery MF                  | erythrodermic MF                            |
| FCCL                    | follicle center cell lymphoma               |
| leuk MF                 | leukemic MF                                 |
| LyPap                   | lymphomatoid papulosis                      |
| MCL                     | mantel cell lymphoma                        |
| MF                      | Mycosis fungoides                           |
| pleo CTCL               | pleomorphic CTCL                            |
| SS                      | Sezary syndrom                              |

|        |                               |
|--------|-------------------------------|
| ecz    | eczema stage MF               |
| ery    | erythrodermic MF              |
| leuk   | leukemia                      |
| low    | low grade cutaneous lymphomas |
| plaque | plaque stage MF               |

|       |                                             |
|-------|---------------------------------------------|
| EPC   | extracorporeal photophoresis                |
| glyco | glucocorticoids                             |
| IFN   | iniferon $\alpha$                           |
| MTX   | methotraxate                                |
| no    | no treatment at the time serum was prepared |
| PUVA  | psoralen-sensitized UV A treatment          |
| UVB   | UV B treatment                              |
